# Supplementary material
Source: publisher site journal article supplement (http://oneecosystem.pensoft.net/article/download/suppl/3338339/)
Supplement: Supplementary file 1

## LULC types and potential contribution to ES provision

Table S. 1: Key between LUISA ([Baranzelli *et al.*, 2014](#_ENREF_4)) and CORINE LULC types, and scores for the potential contribution of each LULC type to provide relevant ES. Scores are based on the ES potential matrix by [Burkhard *et al.* (2014](#_ENREF_10)), after appropriate rescaling. See main text for additional details.

| **Class code** | **LULC type (LUISA)** | **CORINE equivalent** | **Rule for scoring** | **Air quality regulation** | **Soil erosion control** | **Water flow regulation** |
| --- | --- | --- | --- | --- | --- | --- |
| 1 | Urban | YES | Average from CORINE | 0 | 0.4 | 0 |
| 2 | Industry | YES | Average from CORINE | 0 | 0.4 | 0 |
| 3 | Arable (others) | YES | Average from CORINE | 0.4 | 0.2 | 0.4 |
| 4 | Permanent Crops | YES | Average from CORINE | 0.4 | 0.4 | 0.4 |
| 5 | Pastures | YES | Average from CORINE | 0 | 0.2 | 0.2 |
| 6 | Forests | YES | Average from CORINE | 1 | 1 | 0.6 |
| 7 | Transitional woodland-shrub | YES | Average from CORINE | 0.2 | 0.2 | 0.2 |
| 8 | Cereals | NO | Same as class 3 | 0.4 | 0.2 | 0.4 |
| 9 | Maize | NO | Same as class 3 | 0.4 | 0.2 | 0.4 |
| 10 | Root crops | NO | Same as class 3 | 0.4 | 0.2 | 0.4 |
| 11 | Abandoned Arable Land | NO | Same as class 3 | 0.4 | 0.2 | 0.4 |
| 12 | Abandoned Permanent Crops | NO | Same as class 4 | 0.4 | 0.4 | 0.4 |
| 13 | Abandoned pastures | NO | Same as class 5 | 0 | 0.2 | 0.2 |
| 14 | Abandoned Urban | NO | Same as class 1 | 0 | 0.4 | 0 |
| 15 | Abandoned Industry | NO | Same as class 2 | 0 | 0.4 | 0 |
| 16 | New Energy Crops | NO | Same as class 3 | 0.4 | 0.2 | 0.4 |
| 17 | Natural land | YES | Average from CORINE | 0.2 | 0.6 | 0.4 |
| 18 | Infrastructure | YES | Average from CORINE | 0 | 0.2 | 0 |
| 19 | Other Nature | YES | Average from CORINE | 0 | 0.2 | 0.4 |
| 20 | Wetlands | YES | Average from CORINE | 0 | 0.2 | 0.4 |
| 21 | Water Bodies | YES | Average from CORINE | 0 | 0 | 0.8 |
| 22 | Urban green leisure | YES | Average from CORINE | 0.4 | 0.4 | 0.4 |

### References

Baranzelli C, Jacobs-Crisioni C, Batista E Silva F, Perpiña Castillo C, Lopes Barbosa A, Arevalo Torres J, Lavalle C (2014) The Reference Scenario in the LUISA platform - Updated configuration 2014 - Towards a Common Baseline Scenario for EC Impact Assessment procedures. Publications Office of the European Union, 45 pp. URL: <http://publications.jrc.ec.europa.eu/repository/handle/JRC94069> [ISBN 978-92-79-44702-0] DOI: [10.2788/85104](http://dx.doi.org/10.2788/85104)

Burkhard B, Kandziora M, Hou Y, Müller F (2014) Ecosystem Service Potentials, Flows and Demands - Concepts for Spatial Localisation, Indication and Quantification. Landscape Online 34: 1‑32.
